# Supplementary material for: Tailor-made enzyme consortium segregating sclerenchyma fibre bundles from willow bark
Source: Royal Society of Chemistry journal article supplement (doi:10.1039/d2gc00188h), 2022-01-01
Supplement: d2gc00188h1.pdf [file d2gc00188h1.pdf]

## Supplementary materials

### Tailor-made Enzyme Consortium Segregating Sclerenchyma Fibre Bundles from Willow Bark

Dou Jinze<sup>1\*</sup>, Wang Jincheng<sup>2</sup>, Zhao Jian<sup>2\*</sup>, Vuorinen Tapani<sup>2</sup>

<sup>1</sup>Department of Bioproducts and Biosystems, Aalto University, Espoo, Finland

<sup>2</sup>State Key Laboratory of Microbial Technology, Shandong University, Qingdao, China

Corresponding Authors

\*J. Dou Telephone: +358 413115001. E-mail: [jinze.dou@aalto.fi](mailto:jinze.dou@aalto.fi)

\*J. Zhao Telephone: +86 13573158538. E-mail: [zhaojian@sdu.edu.cn](mailto:zhaojian@sdu.edu.cn)

**Table S1.** The chemical compositional differences between grass (ramie or flax) and wood (willow and spruce) bark.<sup>1-4</sup>

|                 | ramie or flax | willow bark | spruce bark |
|-----------------|---------------|-------------|-------------|
| Holocellulose % | 85-87         | 50          | 40          |
| Pectin %        | 2             | 3           | 13          |
| Lignin %        | 0.2-0.5       | 24-31       | 20          |
| Extractive %    | 5-10          | 10-15       | 20          |
| Suberin %       | 0             | 5           | 1.3         |
| Ash %           | 0             | 5-10        | 4-5         |
| Starch %        | 0             | 1.3         | —           |

**Table S2.** Overview of the determined enzyme activities.

| crude enzymes | Pectate lyase activity (polygalacturonic acid, U/mL) | Pectate lyase activity (apple pectin, U/mL) | Xylanase activity (U/mL) | Mannanase activity (U/mL) | FPA activity (U/mL) |
|---------------|------------------------------------------------------|---------------------------------------------|--------------------------|---------------------------|---------------------|
| 7-3-3         | 2.06                                                 | 1.32                                        | 0.3                      | 1.45                      | 0.15                |
| PelA          | 2215.48                                              | 111.59                                      | 0.66                     | 3.64                      | 0.23                |
| PelB          | 2.14                                                 | 130.44                                      | 0.23                     | 1.6                       | 0.1                 |
| PelC          | 19.53                                                | 4.45                                        | 0.21                     | 1.36                      | 0.12                |
| PelAPelC      | 2245.66                                              | 121.01                                      | 0.48                     | 3.45                      | 0.23                |
| AbnA          | 2.17                                                 | 1.25                                        | 0.24                     | 1.63                      | 0.09                |
| RhgW          | 2.25                                                 | 1.33                                        | 0.24                     | 1.25                      | 0.1                 |
| GmuG          | 2.32                                                 | 1.44                                        | 0.23                     | 489.17                    | 0.11                |
| XynA          | 3.31                                                 | 1.55                                        | 247.55                   | 1.59                      | 0.12                |

**Table S3.** The characteristics of the studied strains or plasmids.

| category | Strain or plasmid              | Characteristics                                                                                | Source or reference | Fermentation medium                  |
|----------|--------------------------------|------------------------------------------------------------------------------------------------|---------------------|--------------------------------------|
| Plasmids | pNW33n                         | Chloramphenicol resistance, <i>Escherichia coli</i> - <i>Bacillus subtilis</i> shuttle plasmid | 5                   |                                      |
| Strains  | <i>Bacillus subtilis</i> 7-3-3 | wild type                                                                                      | 5                   | production medium II (2× Super-rich) |
|          | BSpelA                         | <i>pelA</i> -overexpressed by pNW33n                                                           | 5                   | production medium I                  |
|          | BSpelB                         | Overexpression of <i>pelB</i> by P43 promoter                                                  | This study          | production medium II (2× Super-rich) |
|          | BSpelC                         | Overexpression of <i>pelC</i> by P43 promoter                                                  | This study          | production medium I                  |
|          | BspelApeIC                     | Coexpression of <i>pelA</i> and <i>pelC</i>                                                    | This study          | production medium I                  |
|          | BSabnA                         | Overexpression of <i>abnA</i> by P43 promoter                                                  | This study          | production medium II (2× Super-rich) |
|          | BSrhgW                         | Overexpression of <i>rhgW</i> by P43 promoter                                                  | This study          | production medium II (2× Super-rich) |
|          | BSgmuG                         | Overexpression of <i>gmuG</i> by P43 promoter                                                  | This study          | production medium II (2× Super-rich) |
|          | BSxynA                         | Overexpression of <i>xynA</i> by P43 promoter                                                  | This study          | production medium II (2× Super-rich) |

**Table S4.** The sequence of primers used in this study. The strains and plasmids used in this study are shown in **Table S3**. Gene *pelB*, *pelC*, *abnA*, *rhgW*, *gmuG*, *xynA* and P43 promoter were cloned from the genome DNA of *B. subtilis* 7-3-3 using gene specific primers (as shown in this table). Purified PCR products were cloned into plasmids using a one-step cloning kit (TransGene Biotech, Beijing, China) and transformed into *Escherichia coli* DH5α. The positive clones were verified by sequencing. Then the correct recombinant vector was transformed into *B. subtilis* 7-3-3 by electrotransformation<sup>5</sup>.

| primer | sequence                                           |
|--------|----------------------------------------------------|
| P43-F  | <u>TTGAATTCGAGCTCGGTAGGTATGTTTTCGCTTGAGCTTTT</u>   |
| P43-R  | <u>CATGTGTACATTCCTCTCTTACCT</u>                    |
| PelB-F | <u>GAGAGGAATGTACACATGAAACGACTTTGTTTATGGTTC</u>     |
| PelB-R | <u>TACGCCAAGCTTGCATGCCAGTAGCCAAATACCAGAGTTGTA</u>  |
| PelC-F | <u>GAGAGGAATGTACACATGAAAAAATCGTGTCTATCCTATTT</u>   |
| PelC-R | <u>TACGCCAAGCTTGCATGCTTAAAATTGAGTGTTGTTGTTTTCG</u> |
| AbnA-F | <u>GAGAGGAATGTACACATGAAAAAGAAAAAACATGGAAACG</u>    |
| AbnA-R | <u>TACGCCAAGCTTGCATGCTCAATAGGACGGCCAGCCCGAAC</u>   |
| RhgW-F | <u>GAGAGGAATGTACACATGAGAAGGAGCTGTCTGATGATTAG</u>   |
| RhgW-R | <u>TACGCCAAGCTTGCATGCTTAAGGCGTATACATATTTGGTTTT</u> |
| Gmug-F | <u>GAGAGGAATGTACACATGGGGGAGTTGCATTTG TTTAAGA</u>   |
| Gmug-R | <u>TACGCCAAGCTTGCATGCTCATTCAACGATTGGCGTTAAAG</u>   |
| XynA-F | <u>GAGAGGAATGTACACATGTTTAAGTTTAAAAAGAATTTT</u>     |
| XynA-R | <u>TACGCCAAGCTTGCATGCTTACCACACTGTTACGTTAGAACT</u>  |

**Table S5.** The experimental recipes for the media preparation between the substrate (willow bark), enzymes (see **Table 2**) and the buffer (pH 9.6 0.2M Glycine -NaOH). For NAWIB and WIB, see **Fig. 1**.

| substrate/ 1g | PelAPel C/ml | 733/ ml | PelB/ ml | Abn A/ml | GmuG/ ml | XynA /ml | PelA / ml | PelC/ ml | RhgW/ ml | Enzyme total/ml | Buffer/ ml | Fibre bundle  | Pectin |
|---------------|--------------|---------|----------|----------|----------|----------|-----------|----------|----------|-----------------|------------|---------------|--------|
| NAWIB         | 1            |         | 0.5      | 0.5      |          |          |           |          |          | 2               | 28.0       | PN-F          | PN-P   |
| NAWIB         | 1            |         | 0.5      | 0.5      | 0.5      | 0.5      |           |          |          | 3               | 27.0       | PHN-F         | PHN-P  |
| WIB           | 1            |         | 0.5      | 0.5      |          |          |           |          |          | 2               | 28.0       | PWI-F         | PWI-P  |
| WIB           | 1            |         | 0.5      | 0.5      | 0.5      | 0.5      |           |          |          | 3               | 27.0       | PHWI-F        | PHWI-P |
| WIB           |              |         |          |          |          |          | 2.5       |          |          | 2.5             | 27.5       | WIB-PelA      | -      |
| WIB           |              |         | 0.5      |          |          |          |           |          |          | 0.5             | 29.5       | WIB-PelB      | -      |
| WIB           | 1            |         |          |          |          |          |           |          |          | 1               | 29.0       | WIB-PelAPelC  | -      |
| WIB           |              |         |          | 0.5      |          |          |           |          |          | 0.5             | 29.5       | WIB-AbnA      | -      |
| WIB           |              |         |          |          |          |          |           | 0.5      |          | 0.5             | 29.5       | WIB-PelC      |        |
| WIB           |              |         |          |          |          |          |           |          | 0.5      | 0.5             | 29.5       | WIB-RhgW      |        |
| WIB           |              | 0.5     |          |          |          |          |           |          |          | 0.5             | 29.5       | WIB-733       |        |
| WIB           |              | 0.5     |          |          |          |          | 0.5       |          |          | 1               | 29.0       | WIB-PelA-733  |        |
| WIB           |              |         |          |          |          |          | 0.5       |          | 0.5      | 1               | 29.0       | WIB-PelA-RhgW |        |
| WIB           |              |         |          | 0.5      |          |          | 0.5       |          |          | 1.5             | 28.5       | WIB-PelA-AbnA | -      |
| NAWIB         |              |         |          |          |          |          |           |          |          | 0               | 30.0       | Na-buffer     | -      |
| WIB           |              |         |          |          |          |          |           |          |          | 0               | 30.0       | WIB-buffer    | -      |

**Table S6.** XPS fitting parameters & resulting relative concentration.

| Sample                            | Name  | Position | FWHM | Line Shape | %At Conc |
|-----------------------------------|-------|----------|------|------------|----------|
| a) PN-F                           | C-C   | 284.8    | 1.4  | GL(30)     | 19.7     |
|                                   | C-O   | 286.6    | 1.4  | GL(30)     | 61       |
|                                   | C=O   | 288      | 1.4  | GL(30)     | 15.4     |
|                                   | O-C=O | 289.2    | 1.4  | GL(30)     | 3.9      |
| b) PHN-F                          | C-C   | 284.8    | 1.5  | GL(30)     | 15.2     |
|                                   | C-O   | 286.6    | 1.5  | GL(30)     | 59.8     |
|                                   | C=O   | 288      | 1.5  | GL(30)     | 20.8     |
|                                   | O-C=O | 289.3    | 1.5  | GL(30)     | 4.2      |
| c) PWI-F                          | C-C   | 284.8    | 1.4  | GL(30)     | 18.3     |
|                                   | C-O   | 286.6    | 1.4  | GL(30)     | 61.3     |
|                                   | C=O   | 288      | 1.4  | GL(30)     | 16.4     |
|                                   | O-C=O | 289.2    | 1.4  | GL(30)     | 3.9      |
| d) PHWI-F                         | C-C   | 284.8    | 1.4  | GL(30)     | 15.8     |
|                                   | C-O   | 286.6    | 1.4  | GL(30)     | 61.4     |
|                                   | C=O   | 287.9    | 1.4  | GL(30)     | 18.7     |
|                                   | O-C=O | 289.3    | 1.4  | GL(30)     | 4.1      |
| e) NaHCO <sub>3</sub><br>20wt% FB | C-C   | 284.8    | 1.4  | GL(30)     | 26.1     |
|                                   | C-O   | 286.5    | 1.4  | GL(30)     | 54.8     |
|                                   | C=O   | 288      | 1.4  | GL(30)     | 15.8     |
|                                   | O-C=O | 289.3    | 1.4  | GL(30)     | 3.4      |
| f) Whatman<br>cellulose           | C-C   | 284.8    | 1.2  | GL(30)     | 12       |
|                                   | C-O   | 286.5    | 1.2  | GL(30)     | 69.4     |
|                                   | C=O   | 288      | 1.2  | GL(30)     | 17.2     |
|                                   | O-C=O | 289.3    | 1.2  | GL(30)     | 1.4      |

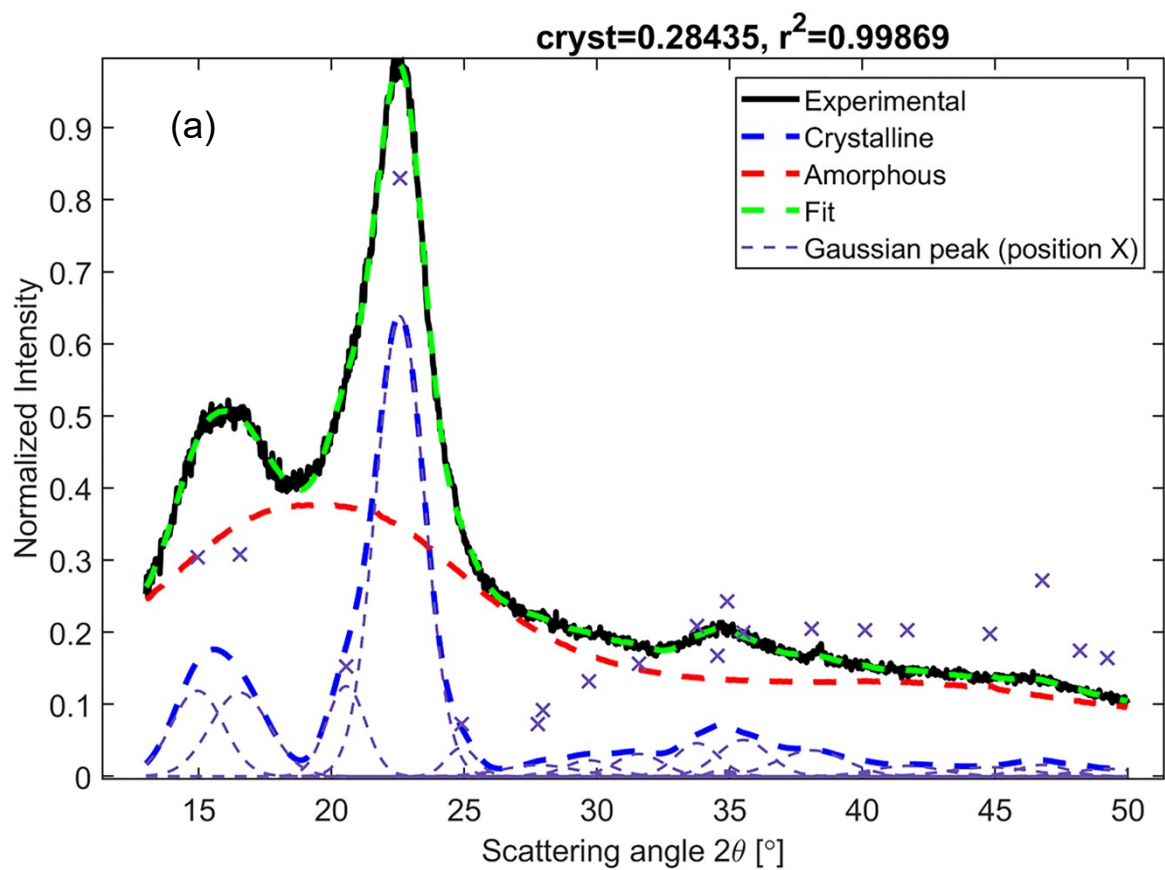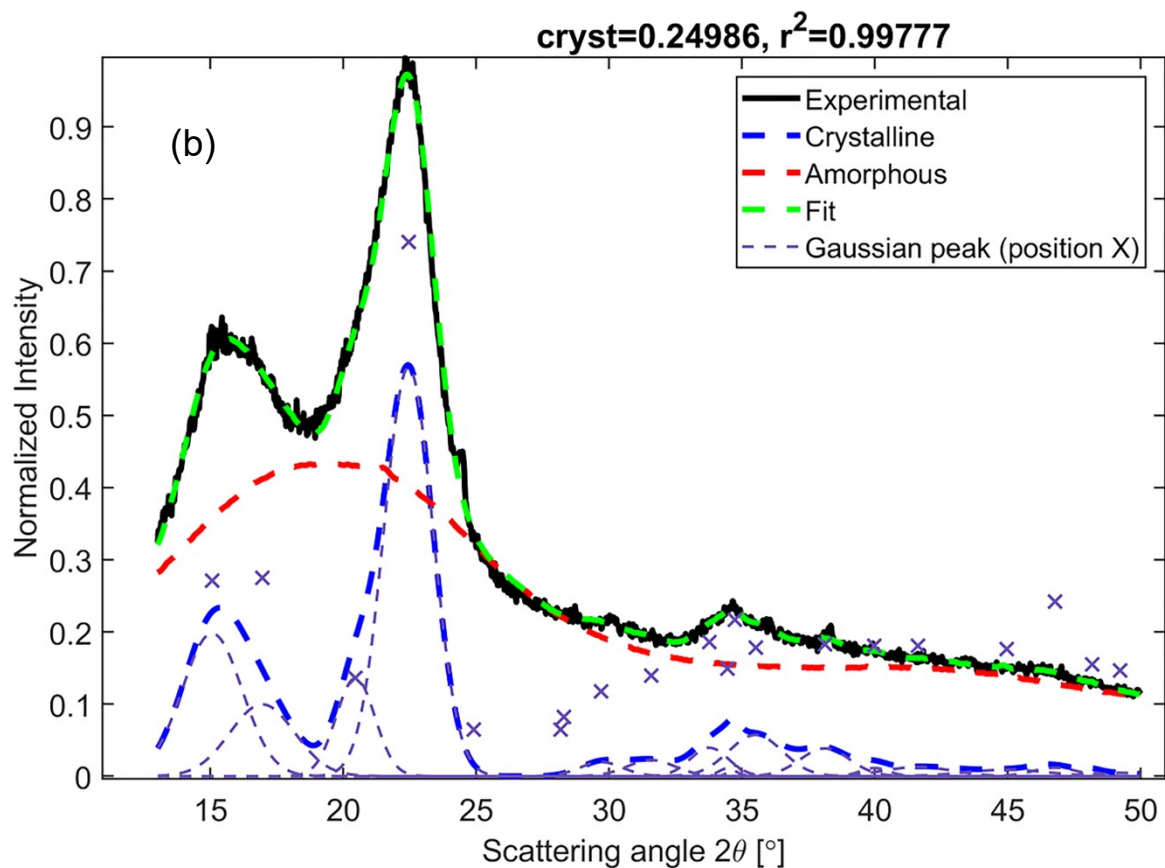

**Fig. S1.** crystallinity analysis results for fibre bundle samples: (a) PWI-F; (b) PN-F based on the amorphous background fitting.

**Table S7.** Yield (% willow bark) of pectin obtained by three different solvents (i.e. citric acid, hydrogen chloride and sodium hydroxide). Standard deviations are shown in the parentheses.

|       | citric acid | HCl       | NaOH    |
|-------|-------------|-----------|---------|
| Yield | 2.8 (0.2)   | 1.5 (0.4) | 1.5 (0) |

**Table S8.** Chemical shift assignments for dialyzed citric acid extracted pectin (DCA-P, Fig. 2) of willow bark, referenced to TSP-d4.

| Residue               | Label              | C-1<br><i>H-1</i> | C-2<br><i>H-2</i> | C-3<br><i>H-3</i> | C-4<br><i>H-4</i> | C-5<br><i>H-5;5'</i> | C-6<br><i>H-6;6'</i> | $\frac{\text{CH}_3\text{C}}{\text{O}}$ | $\frac{\text{CH}_3\text{C}}{\text{O}}$ | $\frac{\text{CH}_3\text{O}}{\text{O}}$ |
|-----------------------|--------------------|-------------------|-------------------|-------------------|-------------------|----------------------|----------------------|----------------------------------------|----------------------------------------|----------------------------------------|
| →4)-α-GalpA-6-OMe-(1→ | GalpA (OMe)        | 102.9             | 70.8              | 71.6              | 82.1              | 73.5                 |                      |                                        |                                        | 55.9                                   |
|                       |                    | 5.4               | 3.7               | 4.11              | 4.31              | 5.1                  |                      |                                        |                                        | 3.82                                   |
| →4)-α-GalpA-3-OAc-(1→ | GalpA (OAc)        | 102.9             | 71.6              | 73.7              | <i>n.d.</i>       | 73.5                 |                      | 23.6                                   |                                        |                                        |
|                       |                    | 5.4               | 4.11              | 5.14              | <i>n.d.</i>       | 5.1                  |                      | 2.16                                   |                                        |                                        |
| →4)-α-GalpA-(1→       | GalpA              | 102.9             | 69.3              | 69.7              | 83.2              | 74.2                 |                      |                                        |                                        |                                        |
|                       |                    | 5.4               | 3.83              | 3.9               | 4.27              | 4.73                 |                      |                                        |                                        |                                        |
| →5)-α-Araf-(1→        | A <sub>1,5</sub>   | 110.5             | 84.2              | 79.5              | 85.4              | 69.4                 |                      |                                        |                                        |                                        |
|                       |                    | 5.09              | 4.15              | 3.98              | 4.22              | 3.81                 |                      |                                        |                                        |                                        |
| →3)-α-Araf-(1→        | A <sub>1,3</sub>   | 109.4             | 84.2              | 87                | 84.5              | 64.1                 |                      |                                        |                                        |                                        |
|                       |                    | 5.26              | 4.31              | 4.07              | 4.23              | 3.84;3.73            |                      |                                        |                                        |                                        |
| →2,3,5)-α-Araf-(1→    | A <sub>2,3,5</sub> | 109.5             | 88.03             | 83.3              | 85.2              | 69.2                 |                      |                                        |                                        |                                        |
|                       |                    | 5.19              | 4.33              | 4.26              | 4.3               | 3.95                 |                      |                                        |                                        |                                        |
| →2,5)-α-Araf-(1→      | A <sub>2,5</sub>   | 109.6             | 89.9              | <i>n.d.</i>       | <i>n.d.</i>       | <i>n.d.</i>          |                      |                                        |                                        |                                        |
|                       |                    | 5.19              | 4.18              | <i>n.d.</i>       | <i>n.d.</i>       | <i>n.d.</i>          |                      |                                        |                                        |                                        |
| β-Araf-(1→            | A <sub>1-β</sub>   | 102.7             | 79.7              | 76.5              | 85.2              | 65.5                 |                      |                                        |                                        |                                        |
|                       |                    | 5.42              | 4.03              | 3.98              | 3.91              | 3.82                 |                      |                                        |                                        |                                        |
| α-Araf-(1→            | A <sub>1-α</sub>   | 112.3             | 79.7              | 76.5              | 85.2              | 65.5                 |                      |                                        |                                        |                                        |
|                       |                    | 5.25              | 4.03              | 3.98              | 3.91              | 3.82                 |                      |                                        |                                        |                                        |
| →2)-α-Rhap-(1→        | R <sub>1,2</sub>   | 112.2             | 78.3              | 69.7              | 74.9              | 72.9                 | 19.6                 |                                        |                                        |                                        |
|                       |                    | 5.26              | 4.18              | 3.89              | 3.45              | 3.67                 | 1.26                 |                                        |                                        |                                        |
| →2,4)-α-Rhap-(1→      | R <sub>1,2,4</sub> | 112.2             | 78.3              | 72.7              | 83.3              | 69.9                 | 19.6                 |                                        |                                        |                                        |
|                       |                    | 5.26              | 4.18              | 4.06              | 3.73              | 3.87                 | 1.26                 |                                        |                                        |                                        |
| β-Galp-(1→            | Ga                 | 106.6             | 74.7              | 75                | <i>n.d.</i>       | 77.6                 | 63.6                 |                                        |                                        |                                        |
|                       |                    | 4.47              | 3.53              | 3.65              | <i>n.d.</i>       | 3.72                 | 3.84                 |                                        |                                        |                                        |
| →4)-β-Galp-(1→        | Ga <sub>1,4</sub>  | 107.4             | 75.9              | 76.4              | 80.7              | 79.8                 | 63.7                 |                                        |                                        |                                        |
|                       |                    | 4.65              | 3.69              | 3.78              | 4.17              | 3.67                 | 3.83                 |                                        |                                        |                                        |
| →4)-α-D-Glcp-(1→      | St <sub>1,4</sub>  | 102.5             | 74.5              | 76.5              | 79.7              | 74.2                 | 63.7                 |                                        |                                        |                                        |
|                       |                    | 5.41              | 3.64              | 3.98              | 3.66              | 3.84                 | 3.83                 |                                        |                                        |                                        |

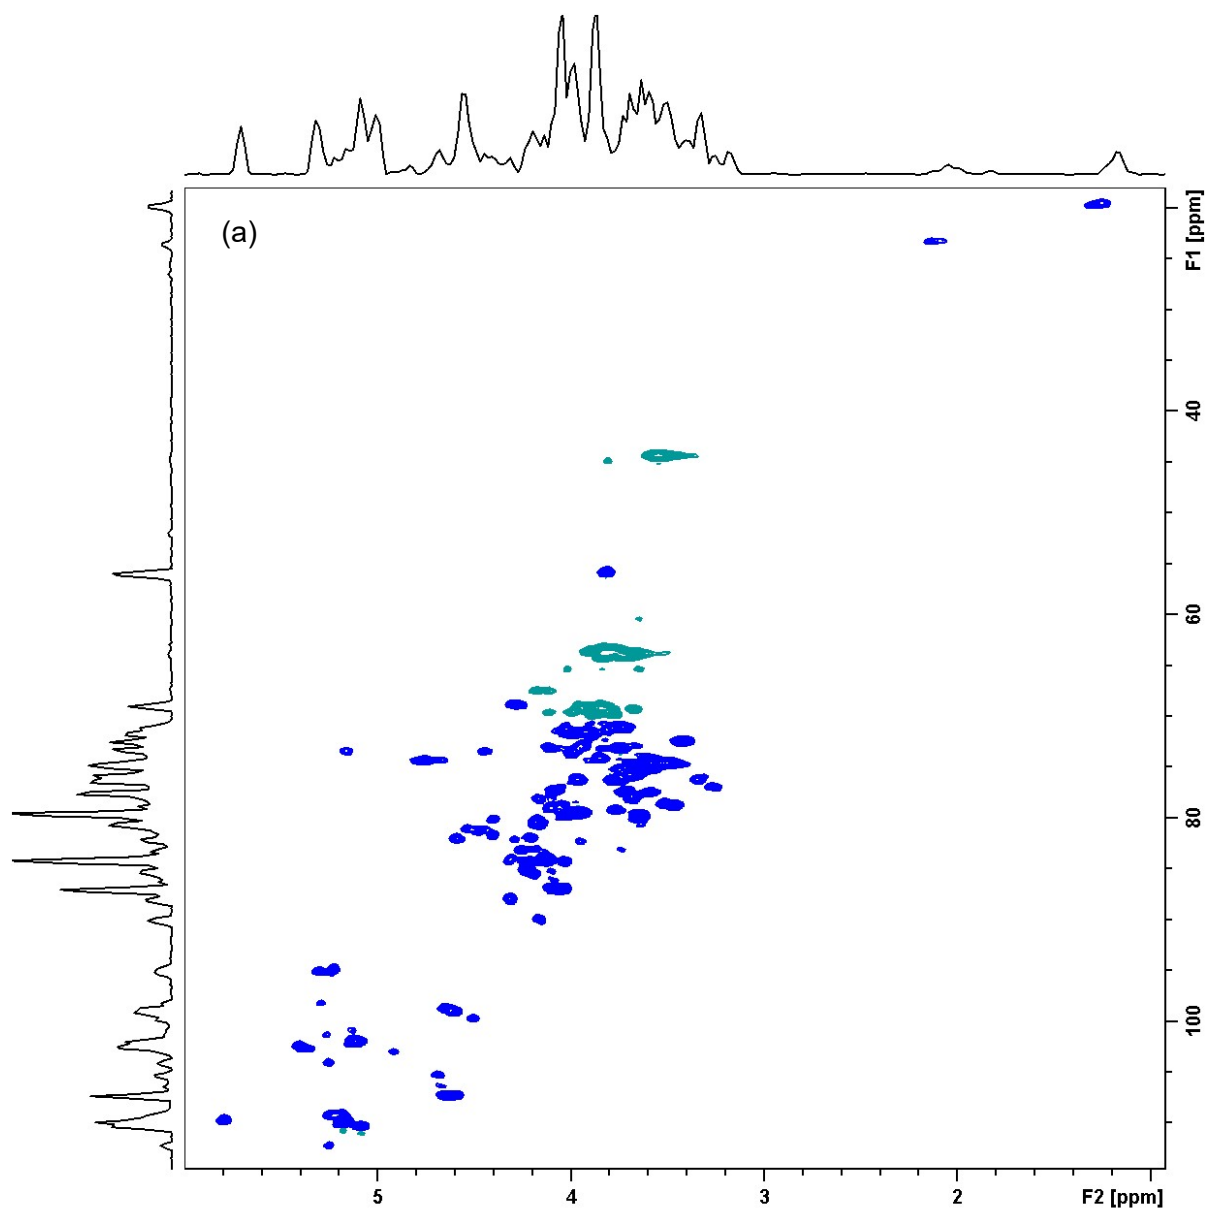



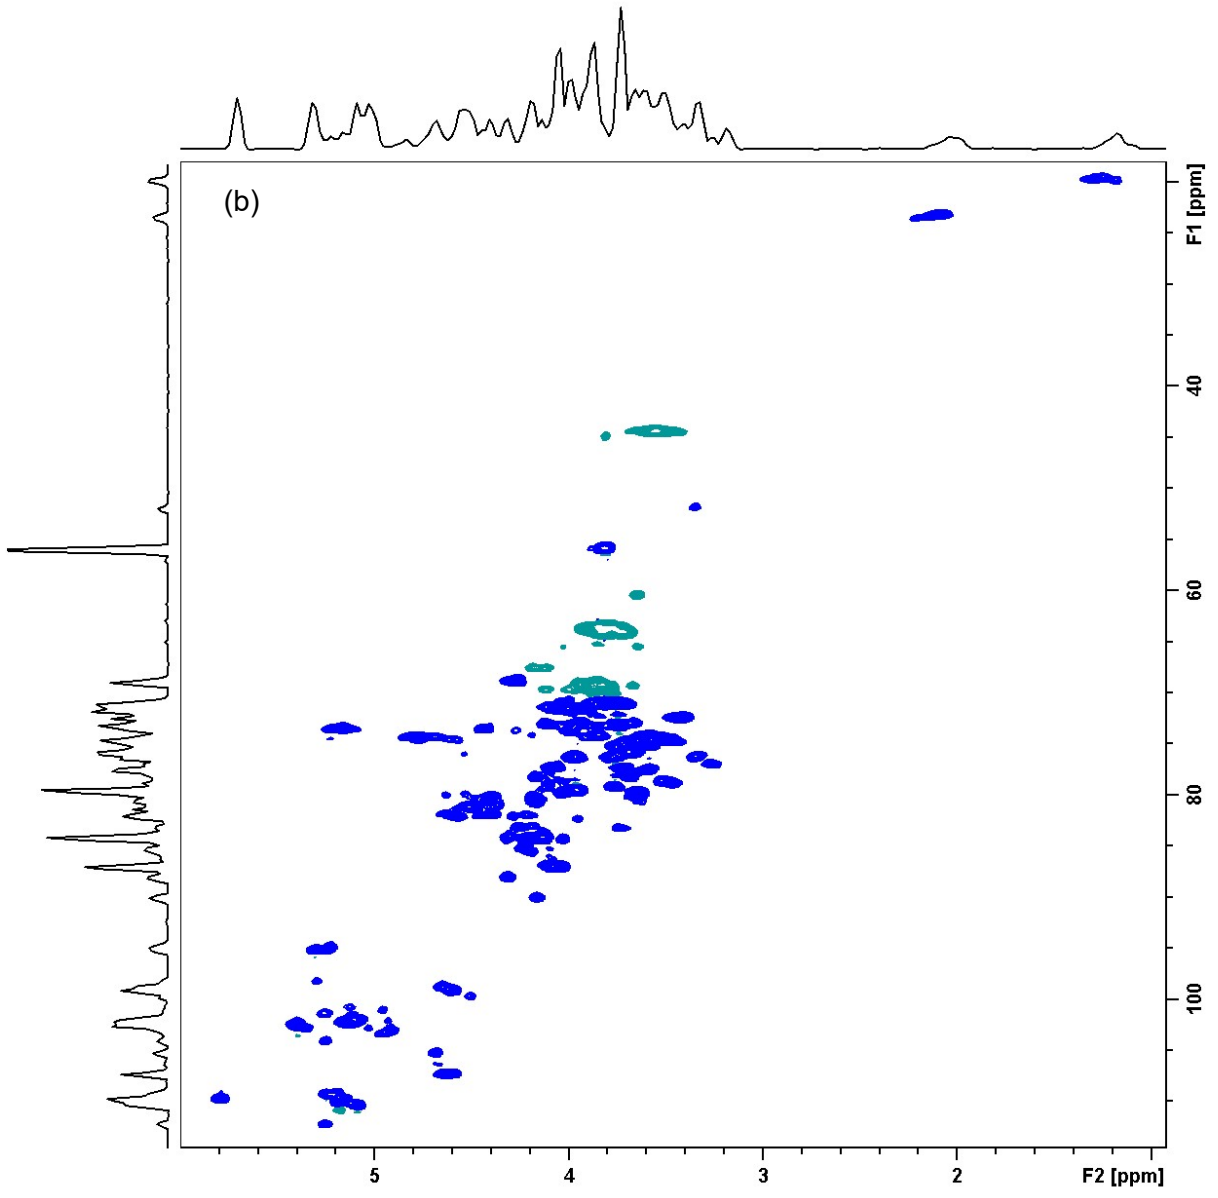

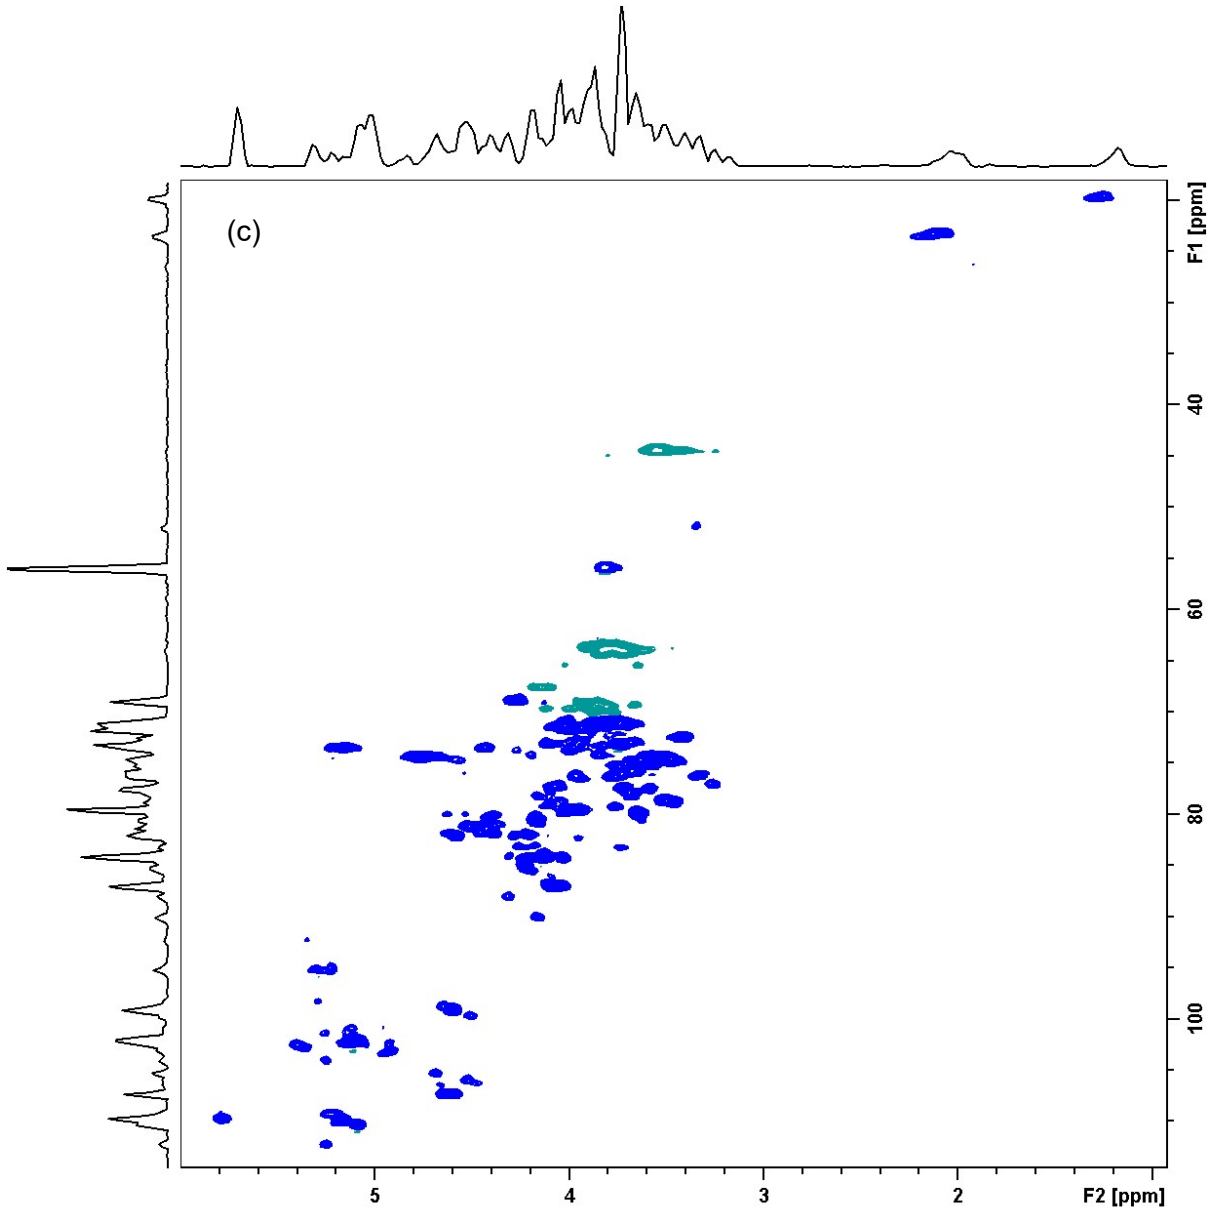

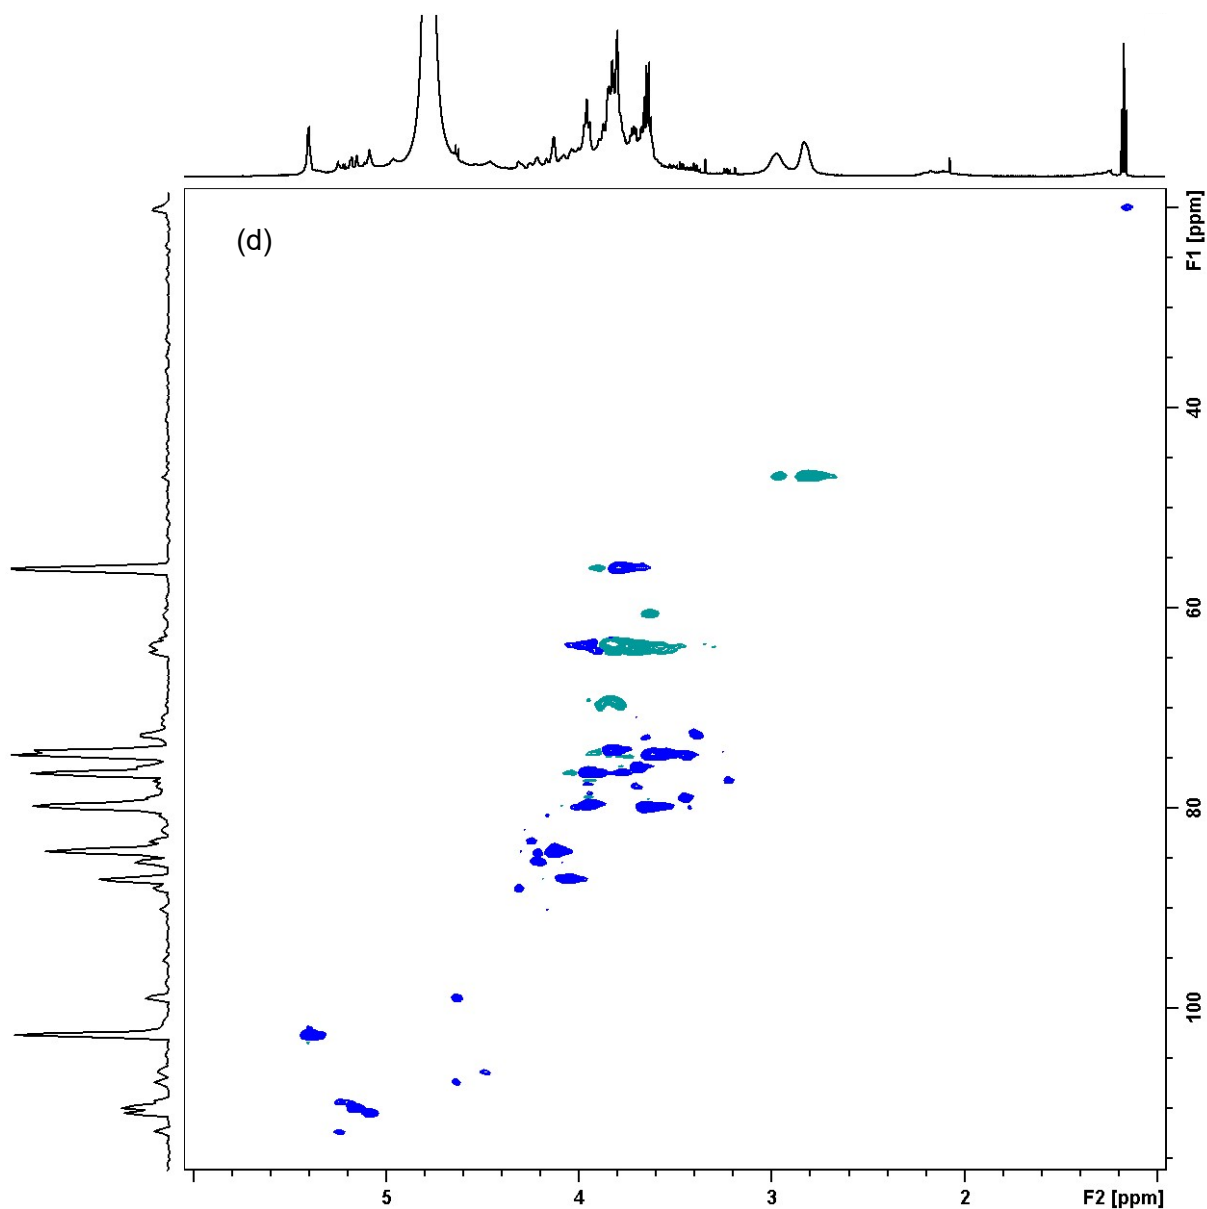

**Fig. S2.**  $\delta\text{C}/\delta\text{H}$  (18.4–114.2/1.0–6.0 ppm) regions of 2D HSQC NMR spectra of PN-P (a), PWI-P (b), PHWI-P (c), and CA-P (d). For abbreviations, see **Table S5** and **Fig. 1**.

**Table S9.** Chemical compositional analysis of the samples from the preliminary study: WIB-PeIA (PeIA treated WIB); WIB-PeIB (PeIB treated WIB); WIB-PeIAPeIC (PeIAPeIC treated WIB); WIB-AbnA (AbnA treated WIB); WIB-PeIC (PeIC treated WIB); WIB-RhgW (RhgW treated WIB); WIB-733 (733 treated WIB); WIB-PeIA-733 (PeIA + 733 treated WIB); WIB-PeIA-RhgW (PeIA + RhgW treated WIB); WIB- PeIA- AbnA (PeIA + AbnA treated WIB); NA-b (NaHCO<sub>3</sub> 3% treated WB with buffer); WIB-b (WIB with buffer). For abbreviations, see **Table S5**. Standard deviations are shown in the parentheses based on three independent experiments.

|                                          | WIB-PeIA   | WIB-PeIB   | WIB-PeIAPeIC | WIB-AbnA   | WIB-PeIC   | WIB-RhgW   | WIB-733     | WIB-PeIA-733 | WIB-PeIA-RhgW | WIB-PeIA-AbnA | NA-b       | WIB-b      |
|------------------------------------------|------------|------------|--------------|------------|------------|------------|-------------|--------------|---------------|---------------|------------|------------|
| fibre bundle yield (% WB)                | 22.4 (1.0) | 25.5 (2.3) | 20.4 (1.9)   | 33.6 (0.5) | 23.4 (0.8) | 33.7 (0.7) | 33.9 (0.03) | 22.6 (1.06)  | 22.5 (0.4)    | 21.3 (1.05)   | 32.0 (0.5) | 38.1 (0.8) |
| <i>Monosaccharide composition (mg/g)</i> |            |            |              |            |            |            |             |              |               |               |            |            |
| Fibre bundle d-Galacturonic acid (GalA)  | 11 (1)     | 15 (0)     | 9 (0)        | 25 (2)     | —          | —          | —           | —            | —             | —             | 22 (4)     | 31 (3)     |
| glucose                                  | 81 (3)     | 91 (5)     | 73 (2)       | 109 (2)    | —          | —          | —           | —            | —             | —             | 99 (6)     | 97 (6)     |
| xylose                                   | 15 (4)     | 19 (1)     | 17 (1)       | 20 (3)     | —          | —          | —           | —            | —             | —             | 26 (5)     | 19 (5)     |
| galactose                                | 2 (1)      | 4 (0)      | 4 (1)        | 6 (0)      | —          | —          | —           | —            | —             | —             | 0 (0)      | 4 (5)      |
| mannose                                  | 8 (5)      | 7 (0)      | 3 (0)        | 12 (3)     | —          | —          | —           | —            | —             | —             | 8 (6)      | 14 (1)     |
| rhamnose                                 | 3 (0)      | 4 (0)      | 3 (0)        | 5 (0)      | —          | —          | —           | —            | —             | —             | 5 (0)      | 6 (1)      |
| arabinose                                | 5 (0)      | 7 (0)      | 5 (0)        | 11 (1)     | —          | —          | —           | —            | —             | —             | 12 (2)     | 14 (1)     |
| pectin Yield (% WB)                      | 2.6 (0.3)  | 1.6 (0.1)  | 3.7 (0.2)    | 0.9 (0.1)  | 2.1 (0.3)  | 1.0 (0.1)  | 1.1 (0.1)   | 2.76 (0.23)  | 2.5 (0.5)     | 2.80 (0.31)   | 0.5 (0.04) | 0.6 (0.1)  |
| Pectin d-Galacturonic acid (GalA) mg/g   | 268 (29)   | 312 (14)   | 277 (12)     | 414 (123)  | —          | —          | —           | —            | —             | —             | —          | —          |

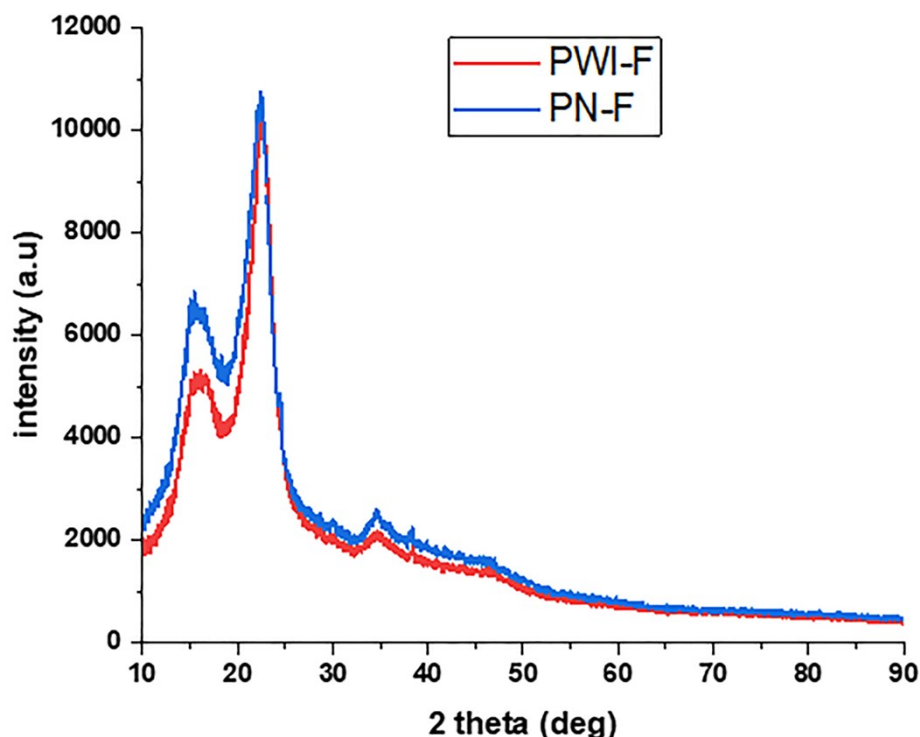

**Fig. S3.** X-ray diffraction (XRD) patterns for fibre bundle samples from PWI-F and PN-F.

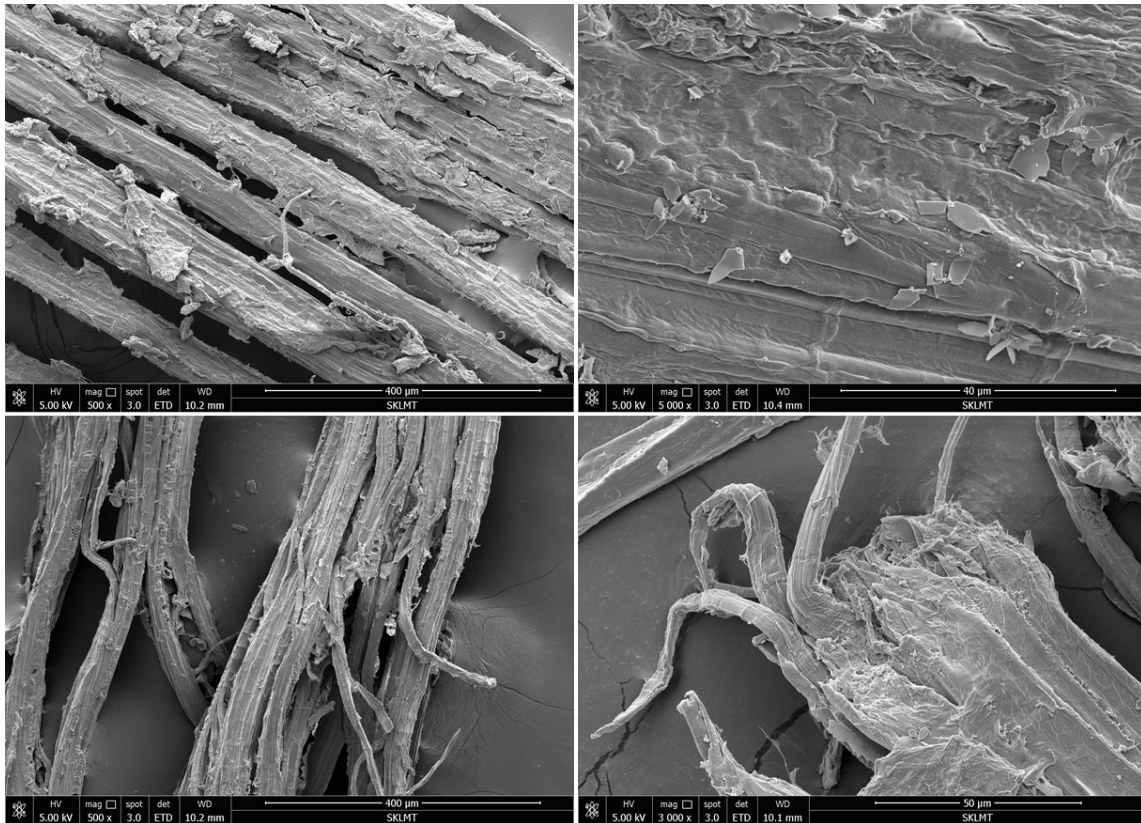

**Fig. S4.** SEM imaging of the isolated fibre bundles from treatment of NAWIB with pectinases (PN-F).

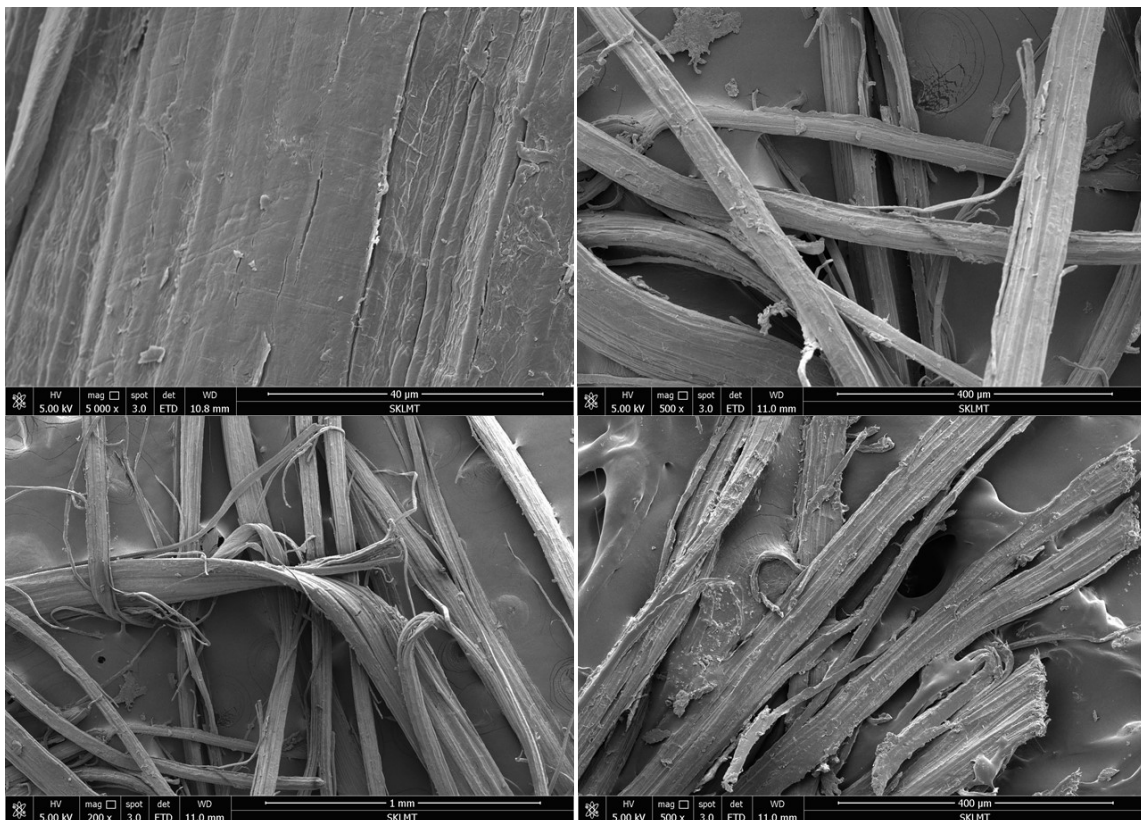

**Fig. S5.** SEM imaging of the isolated fibre bundles from treatment of NAWIB with a mixture of pectinases and hemicellulases (i.e. PHN-F).

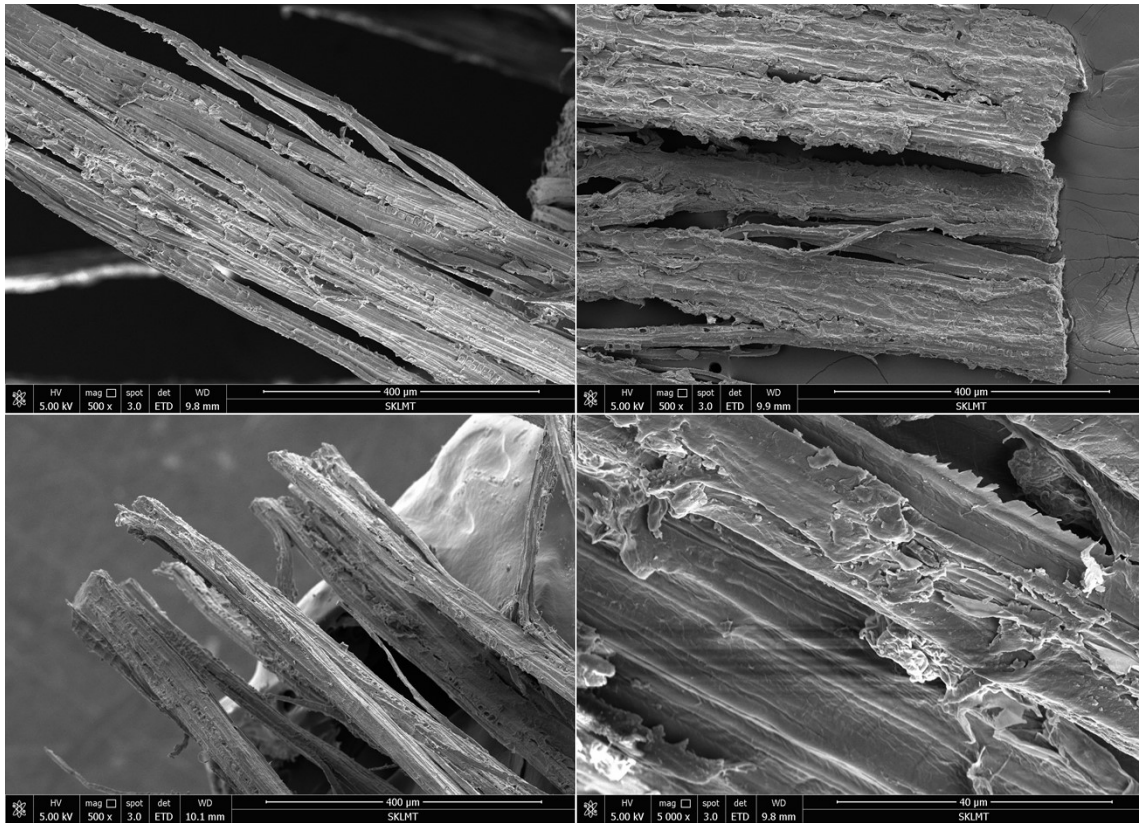

**Fig. S6.** SEM imaging of the isolated fibre bundles from treatment of WIB with pectinases (PWI-F).

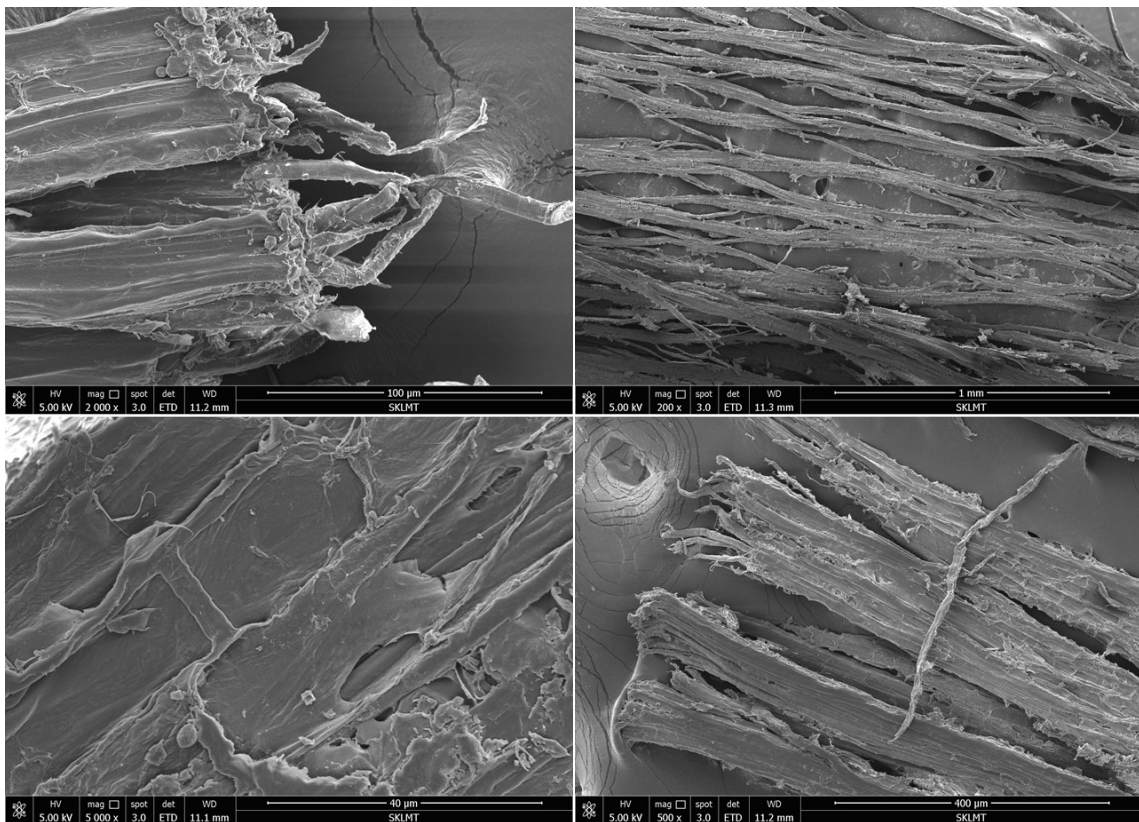

**Fig. S7.** SEM imaging of the isolated fibre bundles from treatment of WIB with a mixture of pectinases and hemicellulases (i.e. PHWI-F).

**Table S10.** Analysis of surface atomic compositions of investigated samples by X-ray-photoelectron spectroscopy (XPS). For abbreviations, see **Table S5** and **Fig.1**.

|                             | CC % | CO % | COO % | COOO % |
|-----------------------------|------|------|-------|--------|
| PN-F                        | 19.7 | 61.0 | 15.4  | 3.9    |
| PHN-F                       | 15.2 | 59.8 | 20.8  | 4.2    |
| PWI-F                       | 18.3 | 61.3 | 16.4  | 3.9    |
| PHWI-F                      | 15.8 | 61.4 | 18.7  | 4.1    |
| NaHCO <sub>3</sub> 20wt% FB | 26.1 | 54.8 | 15.8  | 3.4    |
| reference cellulose         | 12.0 | 69.4 | 17.2  | 1.4    |

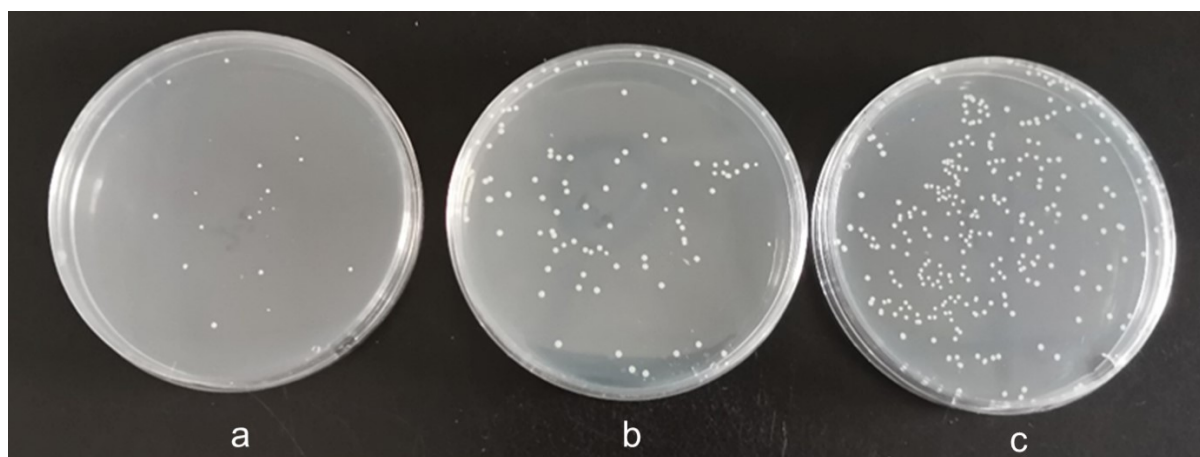

**Fig. S8.** Photograph of the antibacterial experiment of different fabrics against *Staphylococcus aureus* ATCC 29213: a) NaHCO<sub>3</sub> (20wt % dosages) fibre bundle; b) PWI-F; c) cotton (reference sample).

**Table S11.** CIELab coordinates (Elrepho, Lorentz & Wetter) measured from the obtained fibre bundles of this study in comparison to the fibre bundles obtained by the thermochemical method (i.e. NaHCO<sub>3</sub> 20wt% FB)<sup>6</sup>. Standard deviations are included in the parenthesis.

| CIELab coordinate | fibre bundle [this study] | NaHCO <sub>3</sub> (20 wt% dosages) fibre bundle |
|-------------------|---------------------------|--------------------------------------------------|
| ISO brightness    | 8.8 (0.4)                 | 7.3 (1.0)                                        |
| a*                | 7.7 (0.1)                 | 12.2 (0.6)                                       |
| b*                | 19.0 (0.2)                | 19.8 (1.4)                                       |



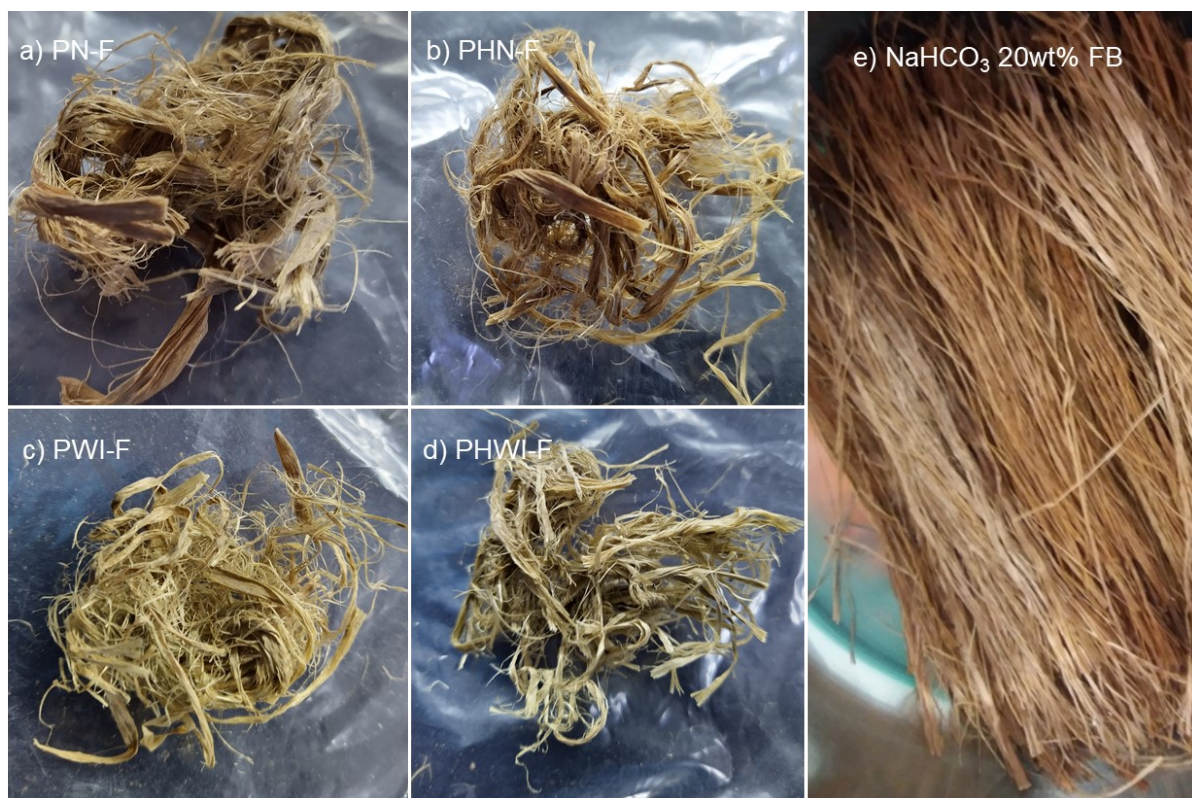

**Fig. S9.** Photograph of both the fibre bundles from present study (a-d) and the  $\text{NaHCO}_3$  (20 wt% dosage) treatment (e)<sup>6</sup>. For abbreviations see **Fig.1**.

**Table S12.** The weight-average molecular weight (Mw) and polydispersity (Mw/Mn) of different ethanol precipitated pectin samples from treatments with aqueous citric acid before (CA-P) and after dialysis (DCA-P), aqueous  $\text{NaHCO}_3$  (NA-P) and pectinases after hot water (PWI-P) and aqueous  $\text{NaHCO}_3$  (PN-P). MF refers to the share of each fraction on total weight of the sample. Standard deviations are shown in the parentheses. Molar mass distribution chromatograms of different willow pectin are displayed at **Fig. S10**.

|       | Whole range        |           | Peak 1             |            |        | Peak 2             |           |        | Peak 3             |           |        | Peak 4             |          |        |
|-------|--------------------|-----------|--------------------|------------|--------|--------------------|-----------|--------|--------------------|-----------|--------|--------------------|----------|--------|
|       | Mw ( $10^5$ g/mol) | Mw/Mn     | Mw ( $10^5$ g/mol) | Mw/Mn      | MF (%) | Mw ( $10^5$ g/mol) | Mw/Mn     | MF (%) | Mw ( $10^5$ g/mol) | Mw/Mn     | MF (%) | Mw ( $10^5$ g/mol) | Mw/Mn    | MF (%) |
| CA-P  | 2.63 (0.3%)        | 5.3 (2%)  | 3.49 (0.3%)        | 3.5 (0.4%) | 72.9   | 0.31 (3%)          | 1.5 (4%)  | 27.1   |                    |           |        |                    |          |        |
| DCA-P | 2.64 (0.5%)        | 3.4 (1%)  | 2.82 (0.5%)        | 3.2 (0.7%) | 92.0   | 0.55 (2%)          | 1.8 (3%)  | 8.0    |                    |           |        |                    |          |        |
| NA-P  | 0.16 (2%)          | 4.3 (15%) | 0.17 (2%)          | 3.4 (6%)   | 89.1   | 0.01 (31%)         | 2.6 (51%) | 10.9   |                    |           |        |                    |          |        |
| PN-P  | 0.51 (1%)          | 4.3 (5%)  | 1.35 (0.6%)        | 2.8 (0.8%) | 32.6   | 0.23 (1%)          | 1.0 (2%)  | 11.9   | 0.14 (4%)          | 1.0 (5%)  | 20.3   | 0.07 (6%)          | 1.2 (9%) | 35.2   |
| PWI-P | 0.42 (2%)          | 3.6 (7%)  | 1.38 (0.7%)        | 2.5 (2%)   | 24.2   | 0.16 (5%)          | 1.1 (8%)  | 41.1   | 0.08 (7%)          | 1.2 (11%) | 34.7   |                    |          |        |



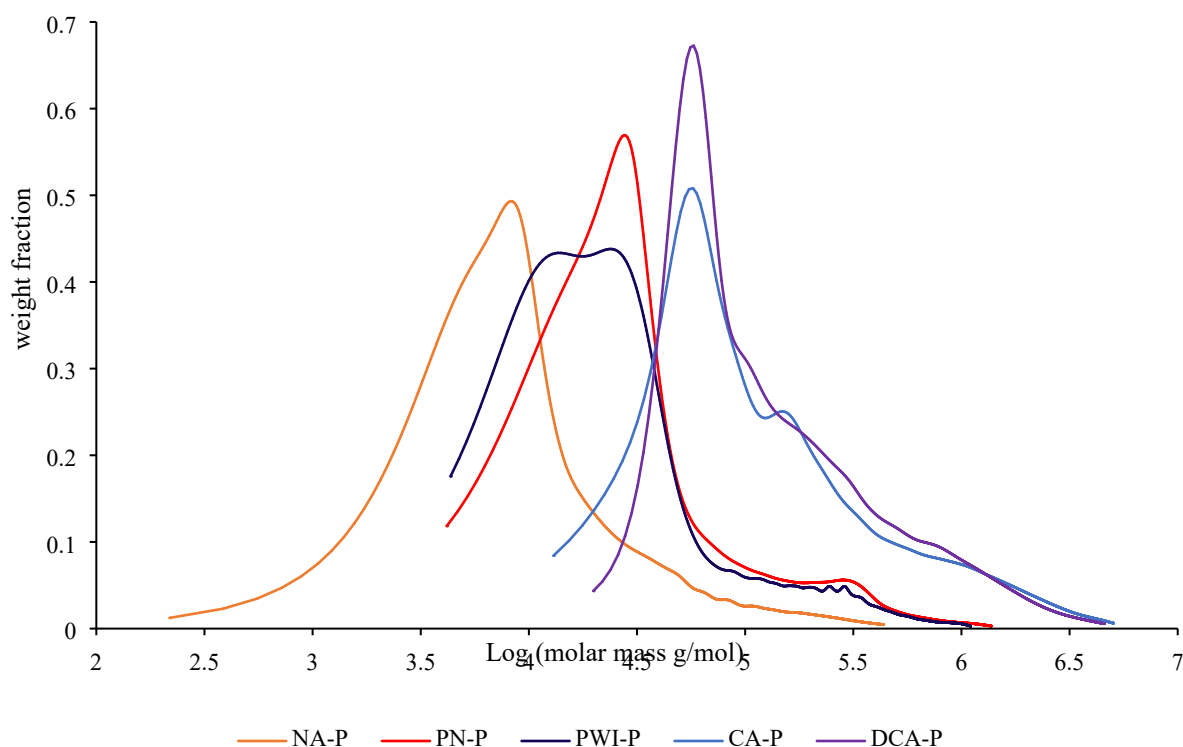

**Fig. S10.** The elution profile of different pectin (i.e. NA-P; PN-P; PWI-P; CA-P and DCA-P) from MALLS-SEC. For abbreviations, see **Table S5** and **Fig.1**.

## Reference

- 1 R. Thakur, C. R. Sarkar and R. Sarmah, *Indian J. Fibre Text. Res.*, 1999, **24**, 276–278.
- 2 J. Dou, D. V. Evtuguin and T. Vuorinen, *J. Agric. Food Chem.*, 2021, **69**, 10848–10855. <https://doi.org/10.1021/acs.jafc.1c04112>.
- 3 J. Dou, H. Kim, Y. Li, D. Padmakshan, F. Yue, J. Ralph and T. Vuorinen, *J. Agric. Food Chem.*, 2018, **66**, 7294–7300. <https://doi.org/10.1021/acs.jafc.8b02014>.
- 4 D. M. Neiva, J. Rencoret, G. Marques, A. Gutiérrez, J. Gominho, H. Pereira and J. C. del Río, *ChemSusChem*, 2020, **13**, 4537–4547. <https://doi.org/10.1002/cssc.202000431>.
- 5 M. Zou, X. Li, W. Shi, F. Guo, J. Zhao and Y. Qu, *Process Biochem.*, 2013, **48**, 1143–1150. <https://doi.org/10.1016/j.procbio.2013.05.023>.
- 6 J. Dou, M. Rissanen, P. Ilina, H. Mäkkylä, P. Tammela, S. Haslinger and T. Vuorinen, *Ind. Crops Prod.*, 2021, **164**, 113387. <https://doi.org/10.1016/j.indcrop.2021.113387>.
